# Supplementary material
Source: publisher site journal article supplement (https://zookeys.pensoft.net/article/6226/download/suppl/36/)

*methodological control:*  
*wing band areas C. rosa*

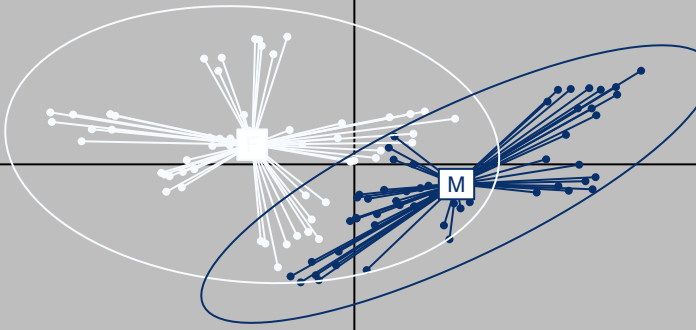

sex

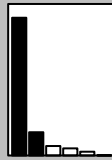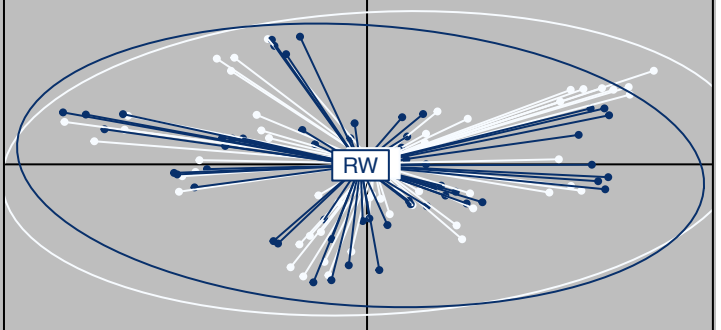

wing

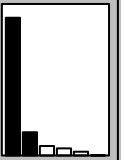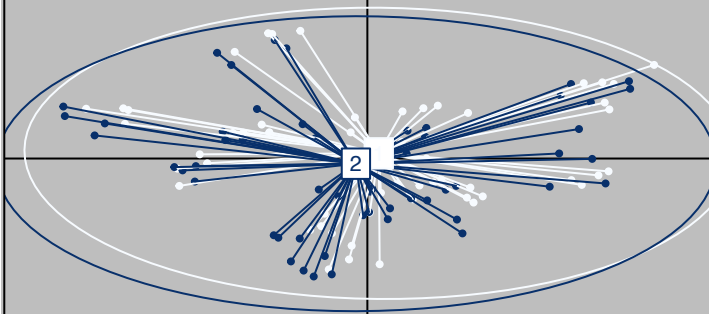

image

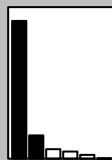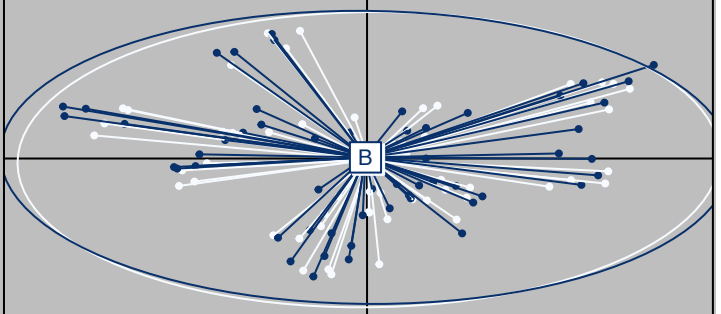

measure

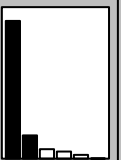

Supplement: Supplementary file
